# Supplementary material for: WIPF1 promotes gastric cancer progression by regulating PI3K/Akt signaling in a myocardin-dependent manner
Source: PubMed Central journal article supplement — iScience. 2023 Oct 20;26(11):108273. doi: 10.1016/j.isci.2023.108273 (PMC10654612; doi:10.1016/j.isci.2023.108273), 2023-10-20
Supplement: mmc1.pdf [file mmc1.pdf]

iScience, Volume 26

## **Supplemental information**

### **WIPF1 promotes gastric cancer progression by regulating PI3K/Akt signaling in a myocardin- dependent manner**

**Fei Su, Ruowen Xiao, Rui Chen, Tianning Yang, Danwen Wang, Xinni Xu, Xiaoming Hou, Quanlin Guan, and Maohui Feng**

**iScience, Volume**

**Supplemental information**

**WIPF1 promotes gastric cancer progression by regulating PI3K/Akt signaling in a myocardin-dependent manner**

**Fei Su, Ruo-wen Xiao, Rui Chen, Tian-ning Yang, Dan-wen Wang, Xin-ni Xu, Xiao-ming Hou, Quan-lin Guan, and Mao-hui Feng**

## SUPPLEMENTAL TABLES

**Table S1. The information of primary antibodies, related to Figure 1-8.**

| Antibody name | Manufacturer      | Dilution |
|---------------|-------------------|----------|
| WIPF1         | Santa Cruz        | 1:800    |
| MYOCD         | Santa Cruz        | 1:1000   |
| Akt           | Proteintech       | 1:600    |
| p-Akt         | Proteintech       | 1:600    |
| PI3K          | Proteintech       | 1:1000   |
| p-PI3K        | Thermo Scientific | 1:1000   |
